# Supplementary material
Source: PubMed Central journal article supplement (PMC4334455)
Supplement: NIHMS594277-supplement-supplement_1.pdf [file NIHMS594277-supplement-supplement_1.pdf]

Table 4 (Supplementary).

Total effect of each dimension of masculine norms on use of alcohol without the other dimensions in the model.

---

| Variable                  | $\beta$ | <i>SE</i> | $R^2$ |
|---------------------------|---------|-----------|-------|
| Winning                   | .14     | .03       | .02   |
| Emotional Control         | -.13    | .03       | .02   |
| Risk Taking               | .21     | .03       | .04   |
| Violence                  | .03     | .03       | .00   |
| Power Over Women          | -.04    | .03       | .00   |
| Playboy                   | .27     | .03       | .07   |
| Self-Reliance             | .04     | .03       | .00   |
| Primacy of Work           | -.04    | .03       | .00   |
| Heterosexual Presentation | -.12    | .03       | .02   |

---

Note.  $N = 804$ .
